# Supplementary material for: Protective Effect of Quercetin 3-O-Glucuronide against Cisplatin Cytotoxicity in Renal Tubular Cells
Source: MDPI journal article supplement (doi:10.3390/molecules27041319), 2022-02-15
Supplement: s1 [file s1]

Supplementary Material

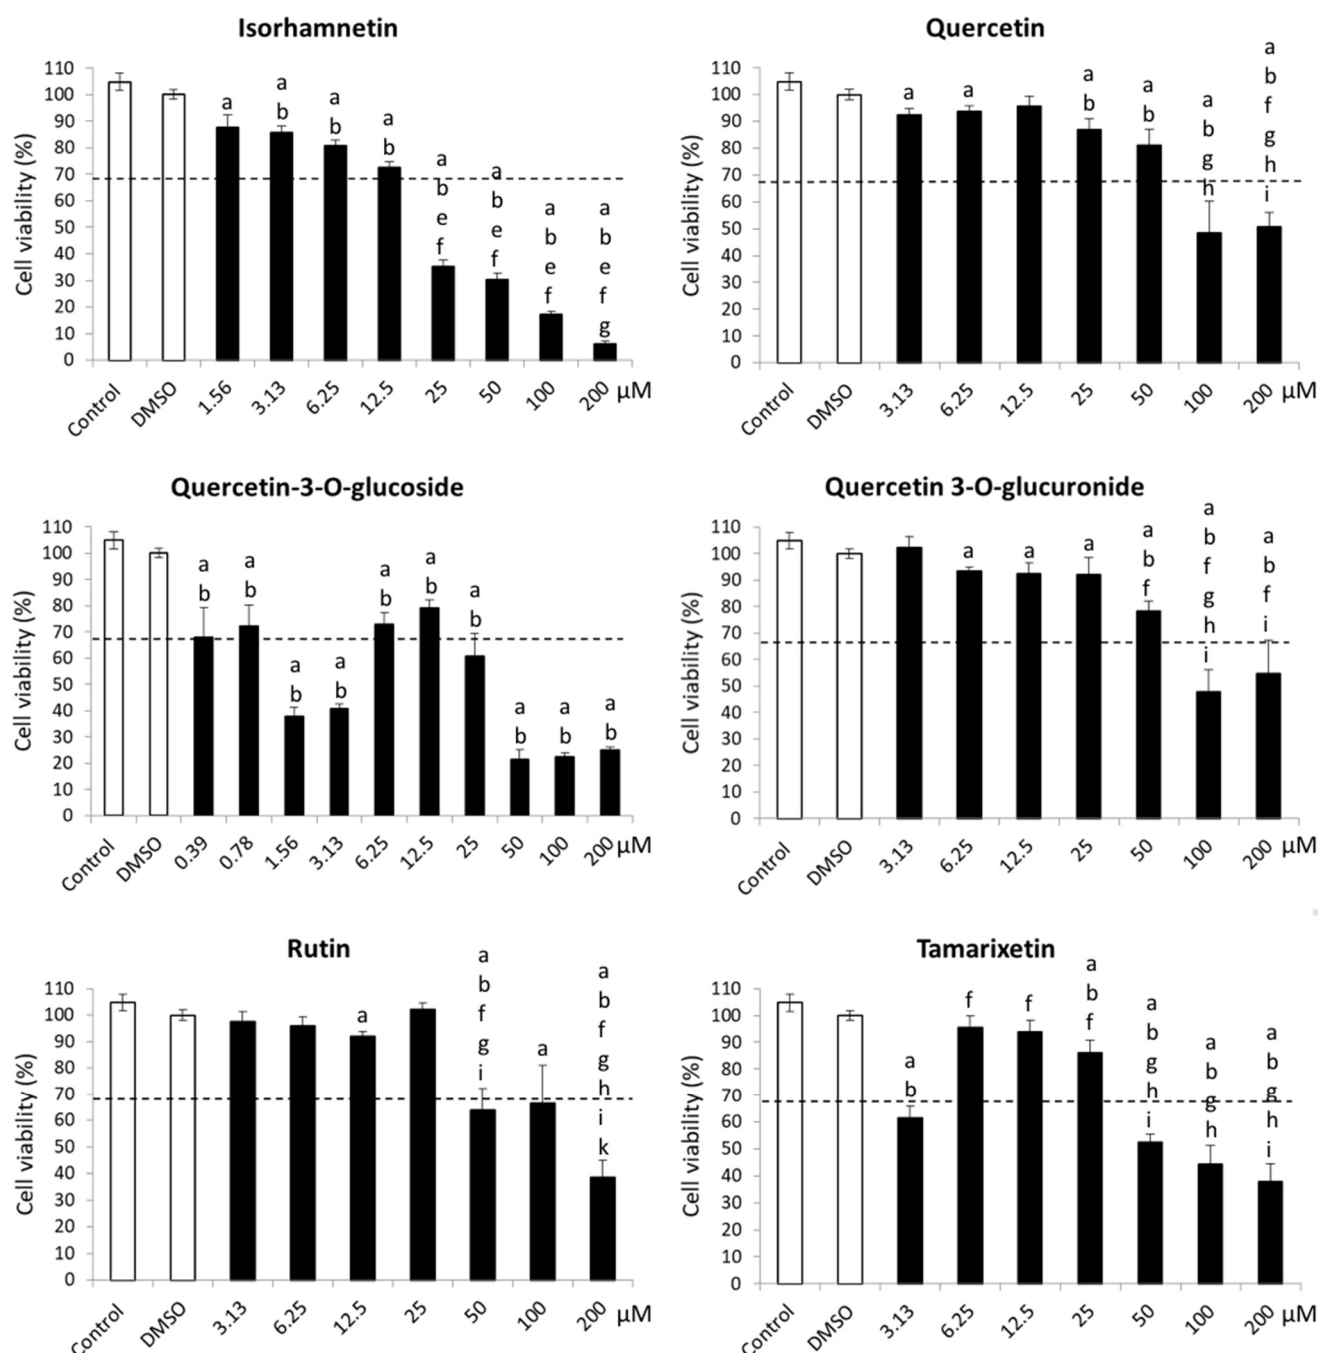

**Figure S1.** Quercetin metabolites safety assays in HK-2 cells for 24 hours of treatment. The MTT technique was used to estimate cell viability. Values are expressed as the mean  $\pm$  SEM. Significant differences ( $p < 0.05$ ): a vs. Control; b vs. DMSO; c vs. 0.39  $\mu$ M; d vs. 0.78  $\mu$ M; e vs. 1.56  $\mu$ M; f vs. 3.13  $\mu$ M; g vs. 6.25  $\mu$ M; h vs. 12.5  $\mu$ M; i vs. 25  $\mu$ M; j vs. 50  $\mu$ M; k vs. 100  $\mu$ M. The dotted line represents the state of the cells before treatment (time 0h). DMSO: dimethyl sulphoxide.

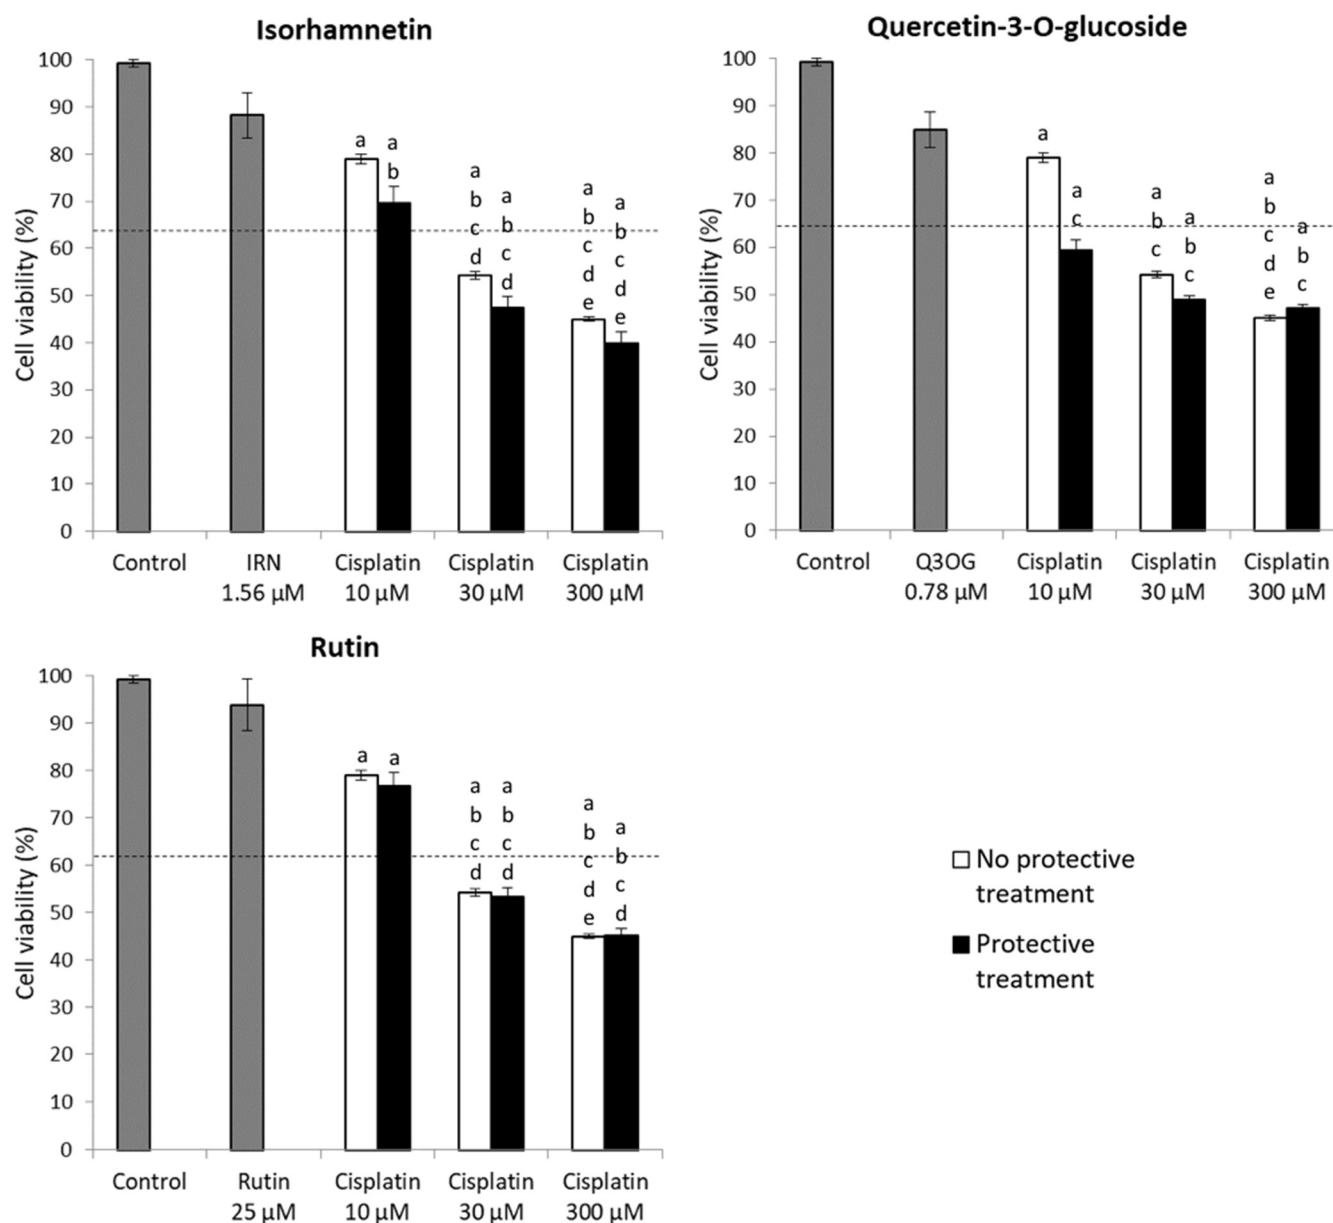

**Figure S2.** Isorhamnetin, quercetin 3-O-glucoside and rutin efficacy assays in HK-2 cells for 24 hours against the cytotoxicity of cisplatin. The cells were pretreated for 6 hours with the corresponding metabolite and subsequently co-treated for 18 hours with the metabolite and 10, 30 and 300 μM cisplatin, respectively. The MTT technique was used to estimate cell viability. Values are expressed as the mean ± SEM. Significant differences ( $p < 0.05$ ): a vs. Control; b vs. Protective treatment alone; c vs. Cisplatin 10 μM; d vs. Cisplatin 10 μM + Protective treatment; e vs. Cisplatin 30 μM. The dotted line represents the state of the cells before treatment (time 0h). IRN: isorhamnetin; Q3OGs: quercetin-3-O-glucoside.

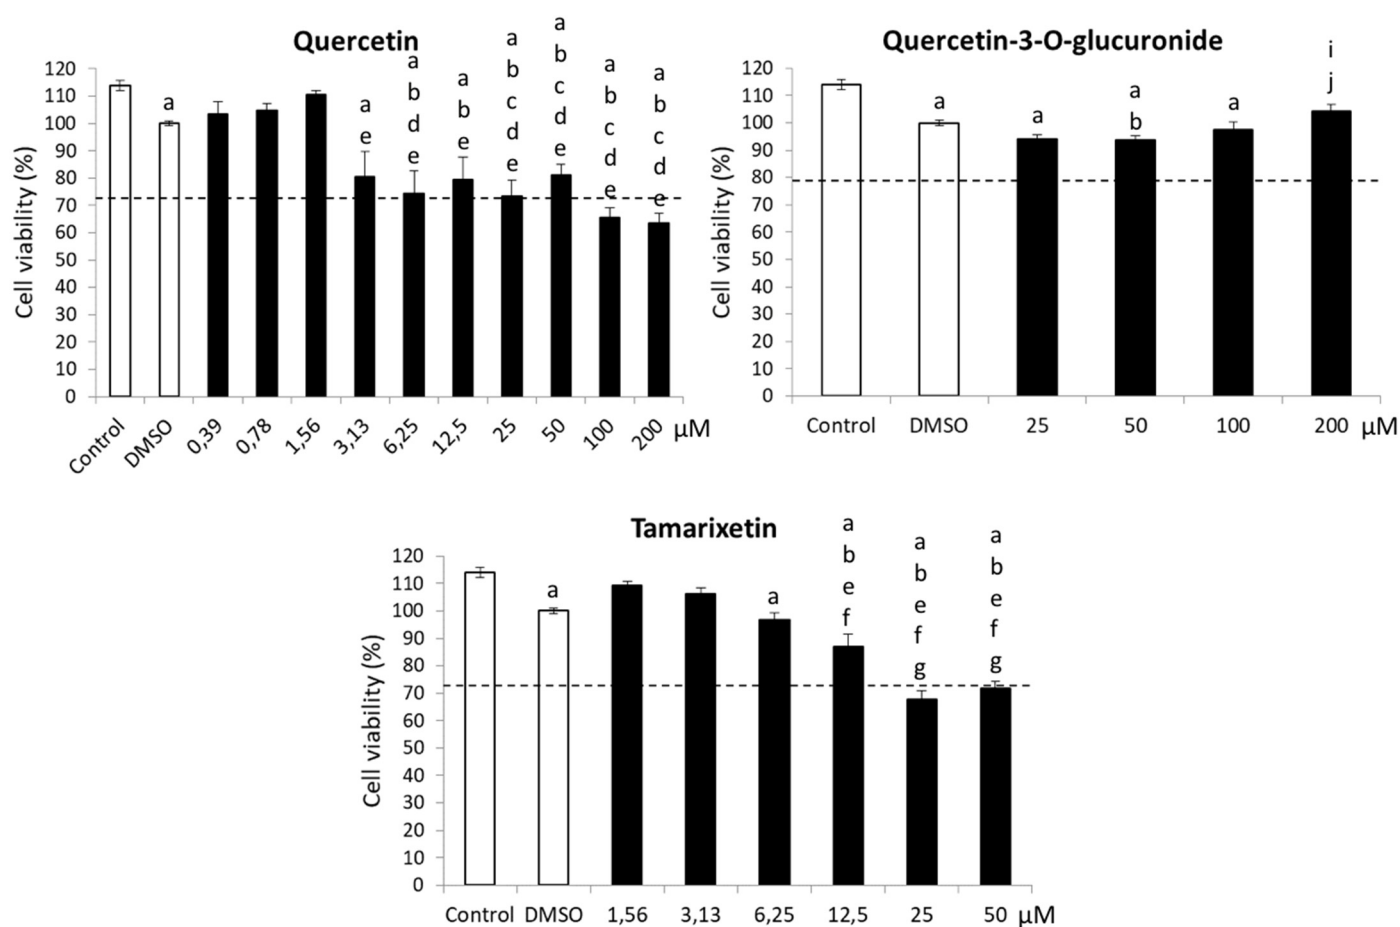

**Figure S3.** Quercetin, quercetin 3-O-glucuronide and tamarixetin safety assays in NRK-52E cells for 24 hours of treatment. The MTT technique was used to estimate cell viability. Values are expressed as the mean  $\pm$  SEM. Significant differences ( $p < 0.05$ ): a vs. Control; b vs. DMSO; c vs. 0.39  $\mu$ M; d vs. 0.78  $\mu$ M; e vs. 1.56  $\mu$ M; f vs. 3.13  $\mu$ M; g vs. 6.25  $\mu$ M; h vs. 12.5  $\mu$ M; i vs. 25  $\mu$ M; j vs. 50  $\mu$ M; k vs. 100  $\mu$ M. The dotted line represents the state of the cells before treatment (time 0h). DMSO: dimethyl sulphoxide.

**Table S1.** Mass spectral data and tentative identification of the compounds detected in the analyzed urine samples.

| Peak | Pseudomolecular ion<br>[M-H] <sup>-</sup><br>(m/z) | MS/MS<br>(m/z)  | Tentative identity                                           |
|------|----------------------------------------------------|-----------------|--------------------------------------------------------------|
| 1    | 243                                                | 201, 183,153    | Protocatechuic acid derivative                               |
| 2    | 231                                                | 187, 151        | Hydroxyphenylacetic acid sulfate                             |
| 3    | 557                                                | 477, 301        | Quercetin glucuronide sulfate                                |
| 4    | 153                                                | 135,109         | Protocatechuic acid                                          |
| 5    | 667                                                | 491             | Methylquercetin diglucuronide                                |
| 6    | 381                                                | -               | Quercetin sulfate                                            |
| 7    | 653<br>463                                         | 477<br>301      | Quercetin diglucuronide<br>Quercetin glucose                 |
| 8    | 557                                                | 477, 301        | Quercetin glucuronide sulfate                                |
| 9    | 477                                                | 301             | Quercetin glucuronide                                        |
| 10   | 571                                                | 491, 315,301    | Methylquercetin glucuronide sulfate                          |
| 11   | 491<br>557                                         | 301<br>477, 301 | Methylquercetin glucuronide<br>Quercetin glucuronide sulfate |
| 12   | 491                                                | 315, 301        | Methylquercetin glucuronide                                  |
| 13   | 381                                                | 301             | Quercetin sulfate                                            |
| 14   | 381                                                | 301             | Quercetin sulfate                                            |
| 15   | 491                                                | 315, 301        | Methylquercetin glucuronide                                  |
| 16   | 381                                                | 301             | Quercetin sulfate                                            |
| 17   | 395                                                | 315, 301        | Methylquercetin sulfate                                      |
| 18   | 395                                                | 315, 301        | Methylquercetin sulfate                                      |
| 19   | 315                                                | 301             | Methylquercetin                                              |
